# Supplementary material for: Safety, prosthesis wearing time and health-related quality of life of lower extremity bone-anchored prostheses using a press-fit titanium osseointegration implant: A prospective one-year follow-up cohort study
Source: PubMed Central journal article supplement (PMC7062258; doi:10.1371/journal.pone.0230027), 2020-03-09
Supplement: pone.0230027.s003.pdf [file pone.0230027.s003.pdf]

## S3 Appendix: Classification of infection

| Table 1. Classification of infection |                                                                                                                                  |                                                                                                                                         |                                 |
|--------------------------------------|----------------------------------------------------------------------------------------------------------------------------------|-----------------------------------------------------------------------------------------------------------------------------------------|---------------------------------|
| Level of Severity                    | Symptoms and Signs                                                                                                               | Treatment                                                                                                                               | Grade                           |
| Low-grade soft tissue infection      | Cellulitis with signs of inflammation (redness, swelling, warmth, stinging pain, pain that increases on loading, tense)          | <ul style="list-style-type: none"> <li>- Oral Antibiotics</li> <li>- Parenteral Antibiotics</li> <li>- Surgical Intervention</li> </ul> | 1<br><br>1A<br><br>1B<br><br>1C |
| High-grade soft tissue infection     | Pus collection, purulent discharge, raised level of C-reactive protein                                                           | <ul style="list-style-type: none"> <li>- Oral Antibiotics</li> <li>- Parenteral Antibiotics</li> <li>- Surgical Intervention</li> </ul> | 2<br><br>2A<br><br>2B<br><br>2C |
| Bone infection                       | Radiographic evidence of osteitis (periosteal bone reaction), radiographic evidence of osteomyelitis (sequestrum and involucrum) | <ul style="list-style-type: none"> <li>- Oral Antibiotics</li> <li>- Parenteral Antibiotics</li> <li>- Surgical Intervention</li> </ul> | 3<br><br>3A<br><br>3B<br><br>3C |
| Implant failure                      | Radiographic evidence of loosening                                                                                               | - Parenteral antibiotics, explantation                                                                                                  | 4                               |
